# Supplementary material for: Hepatic autotaxin overexpression in infants with biliary atresia
Source: PeerJ. 2018 Jul 24;6:e5224. doi: 10.7717/peerj.5224 (PMC6063256; doi:10.7717/peerj.5224)
Supplement: Data S1 [file peerj-06-5224-s001.xlsx]

## Sheet: raw data
ID	ATX expression	Metavir Score
BA1	25	1
BA2	75	1
BA3	87.5	2
BA4	87.5	3
BA5	50	2
BA6	50	2
BA7	25	1
BA8	87.5	3
BA9	75	2
BA10	62.5	2
BA11	50	1
BA12	25	0
BA13	25	0
BA14	62.5	2
BA15	50	1
BA16	50	1
BA17	62.5	2
BA18	0	0
BA19	50	0
BA20	0	0
CTL1	0	2
CTL2	0	0
CTL3	0	0
CTL4	0	0
CTL5	0	0
CTL6	0	0
CTL7	62.5	2
CTL8	25	0
CTL9	25	0
CTL10	25	0
CTL11	25	0
CTL12	25	0
CTL13	0	0
CTL14	0	0

## Sheet: Sheet1
ID	Years	ATX expression	Outcome
1	5	25	0
2	5	50	0
3	5	87.5	0
4	5	87.5	0
5	5	50	0
6	5	50	0
7	5	25	0
8	3	87.5	1
9	5	75	0
10	5	62.5	0
11	4	75	1
12	5	25	0
13	5	25	0
14	1.83333	62.5	1
15	5	50	0
16	5	50	0
17	5	62.5	0
18	0.916667	0	1
19	5	50	0
20	5	0	1
